# Supplementary material
Source: PubMed Central journal article supplement (PMC3014357)
Supplement: mmc1.pdf [file mmc1.pdf]

## Supplemental Data

### Mutations in the 5' UTR of *ANKRD26*, the Ankirin

### Repeat Domain 26 Gene, Cause an Autosomal-Dominant

### Form of Inherited Thrombocytopenia, THC2

Tommaso Pippucci, Anna Savoia, Silverio Perrotta, Núria Pujol-Moix, Patrizia Noris, Giovanni Castegnaro, Alessandro Pecci, Chiara Gnan, Francesca Punzo, Caterina Marconi, Samuele Gherardi, Giuseppe Loffredo, Daniela De Rocco, Saverio Scianguetta, Serena Barozzi, Pamela Magini, Valeria Bozzi, Luca Dezzani, Mariateresa Di Stazio, Marcella Ferraro, Giovanni Perini, Marco Seri, Carlo L. Balduini.

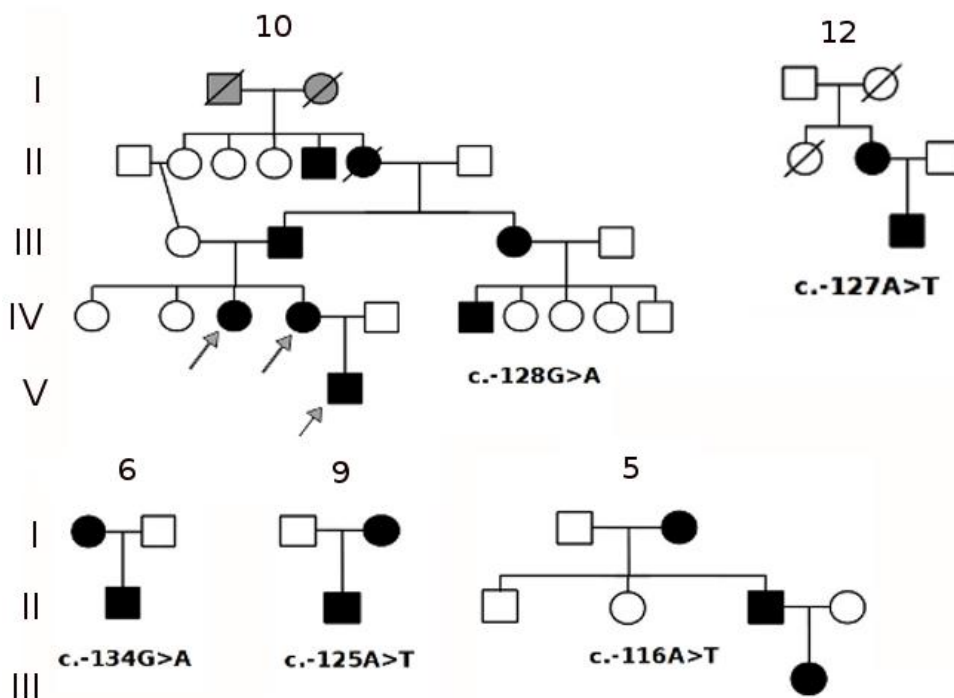

**Figure S1. Five additional THC2 families with mutations in the 5'UTR of *ANKRD26*.** Number of the family and the corresponding mutation are reported above and under each pedigree, respectively. All affected individuals (black symbols) were carriers of the mutations. In family 10 only individuals indicated by arrows were analysed. Healthy relatives (white symbols) were all non carriers. Slashed symbols stand for deceased individuals.

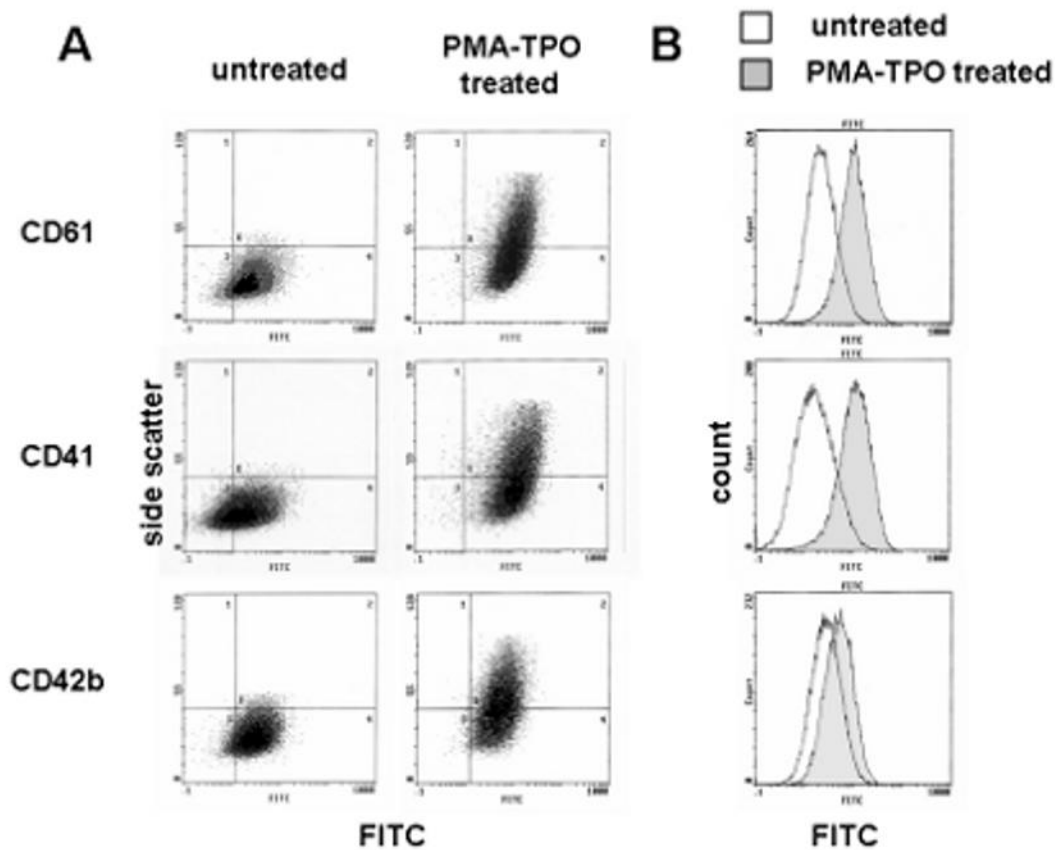

**Figure S2. Flow cytometry assessment of megakaryocytic maturation of Dami cells.** Dami cells at  $1 \times 10^6$ /mL were cultured in modified RPMI 1640 medium (Lonza Ltd, Basel, Switzerland) for 48 hours with or without the addition of 100 nM PMA (Sigma-Aldrich, Milan, Italy) and 10 ng/mL TPO (PeproTech EC Ltd, London, UK). Maturation toward the megakaryocytic lineage of PMA/TPO-treated cells was then routinely assessed by flow cytometry. Dami cells treated with PMA and TPO showed an increase in surface expression of the specific markers associated with megakaryocytic differentiation and maturation CD41, CD61, and CD42b with respect to untreated cells (A and B, FITC). Megakaryocytic maturation was also typically associated with an increase in cell size, as shown by the increased light side scatter of treated cells compared to untreated (A).

| Marker     | Forward Primer             | Reverse Primer             | Position on Chr10   |
|------------|----------------------------|----------------------------|---------------------|
| D10S586    | 5'-GAACAGCAGGATGTCTCG-3'   | 5'-TGAGACTTCATCACATGCGC-3' | 24736107...24736260 |
| D10S572    | 5'-TGGGTAGGAGGCCTTAG-3'    | 5'-TTGTAGAATGCCAGGTAGGG-3' | 25677181...25677532 |
| D10S1775   | 5'-CCTAGTCCCAGAGTCTTG-3'   | 5'-CACAGGTATTGCTGAGTGAG-3' | 26433775...26433947 |
| D10S111    | 5'-AATGTGGTAGCCCATCTC-3'   | 5'-ACATAGGTAGGGTCACACAG-3' | 26810739...26810995 |
| D10S593    | 5'-CAGGACCAACAACCAGAATA-3' | 5'-CACATACCTGTTTGCCATTC-3' | 27163370...27163563 |
| CArepeat 1 | 5'-GTAAAGTACTACGCCAC-3'    | 5'-AATCATCTACTGTTGTAGCC-3' | 27985712...27985881 |
| CArepeat 2 | 5'-CAGAGAGTCAACAAGTAG-3'   | 5'-GATGATTGTTTTGTCTGCCA-3' | 28391309...28391592 |
| D10S174    | 5'-TTCTGTGAGCATCTGTACAG-3' | 5'-TATGAGCCATCCCTAGCCAG-3' | 28610794...28610943 |

**Table S1.** THC2 locus microsatellite markers, forward and reverse primers and physical position relative to the UCSC hg19 assembly.
